# Supplementary figures and images for: Low-molecular weight fractions of Japanese soy sauce act as a RAGE antagonist via inhibition of RAGE trafficking to lipid rafts
Source: Royal Society of Chemistry journal article supplement (doi:10.1039/c2fo30359k), 2013-01-01

# Supplemental Fig. 1

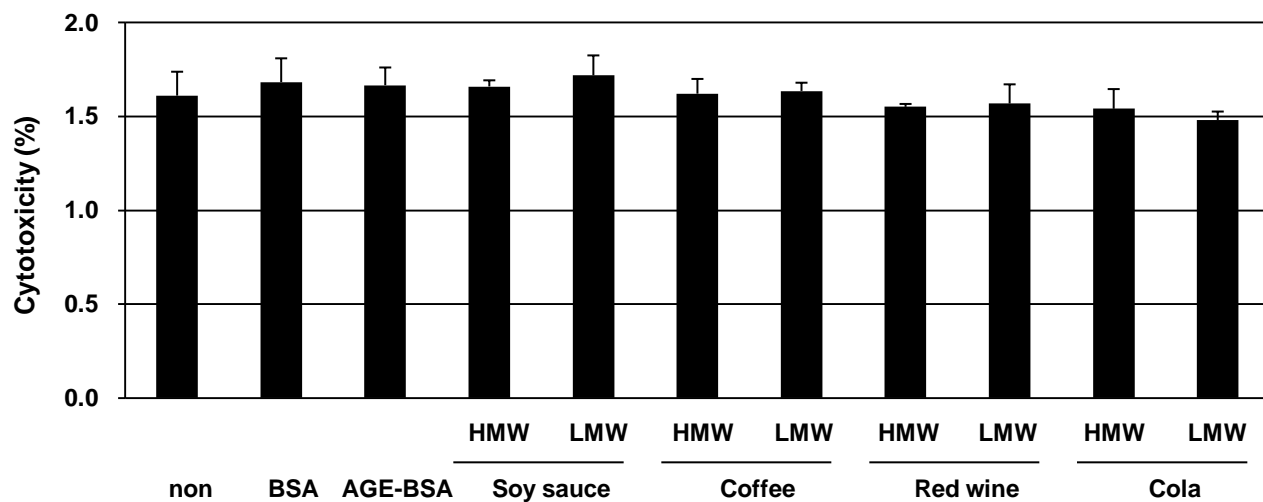

**A**

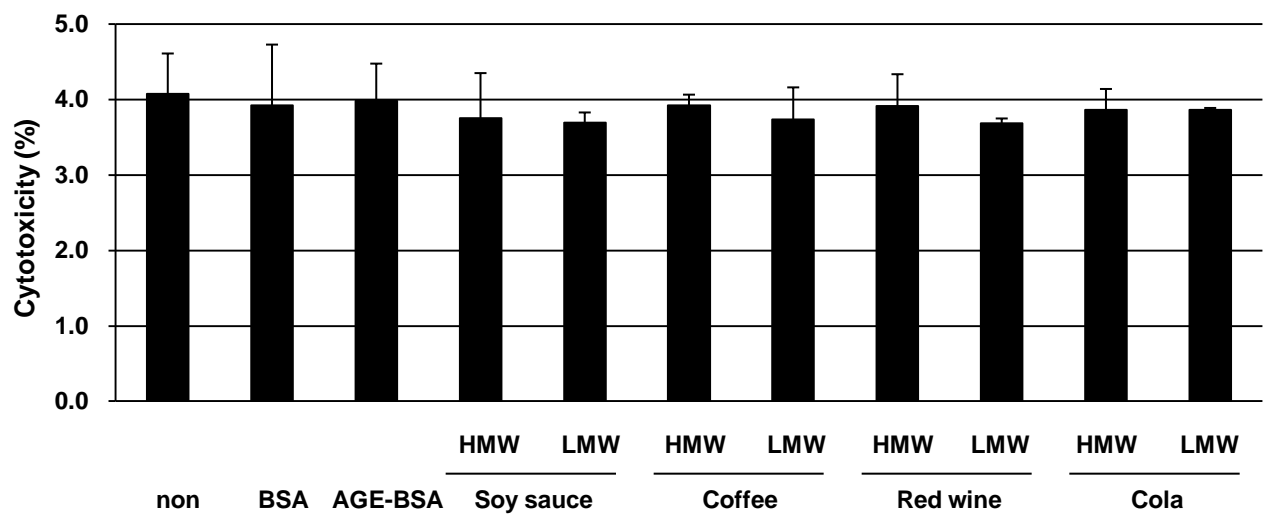

**B**

# Supplemental Fig. 2

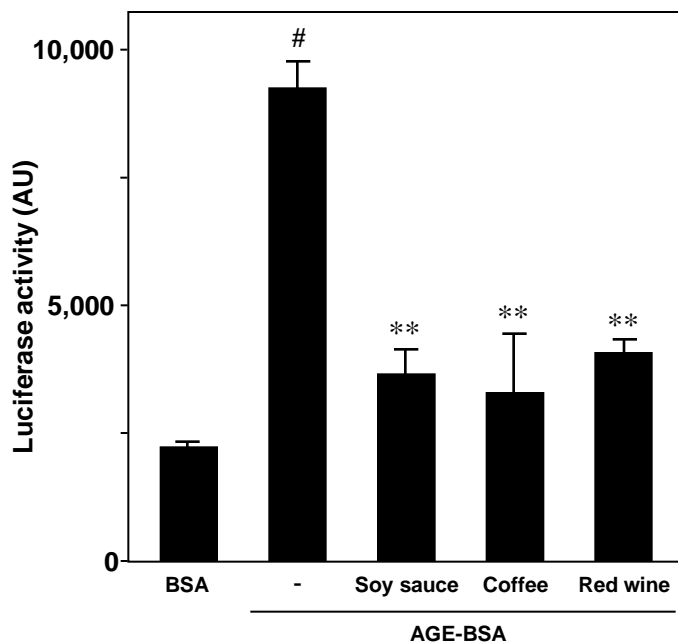

**A**

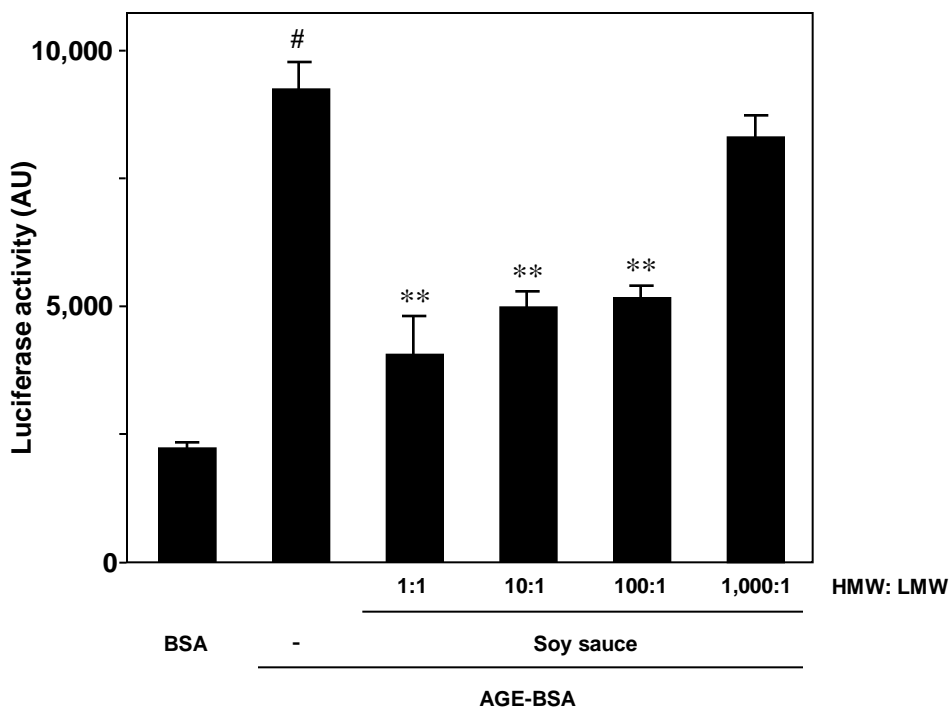

**B**

Supplement: c2fo30359k.pdf [file c2fo30359k.pdf]
